# Supplementary material for: Mechanism of tumor-derived extracellular vesicles in regulating renal cell carcinoma progression by the delivery of MALAT1
Source: PubMed Central journal article supplement — Oncol Rep. 2021 Jul 12;46(3):187. doi: 10.3892/or.2021.8138 (PMC8298989; doi:10.3892/or.2021.8138), 2021-07-12
Supplement: Supplementary_Data1.pdf [file Supplementary_Data1.pdf]

Table S1. Renal cell carcinoma (RCC)-related long non-coding RNAs.

| lncRNA name | Disease name  | Dysfunction type | Description                                                                                                                                                                                                                      | Chr   | Start    | End      | Strand | Species | Alias                                                           | Genbank   | Sequence | Reference |
|-------------|---------------|------------------|----------------------------------------------------------------------------------------------------------------------------------------------------------------------------------------------------------------------------------|-------|----------|----------|--------|---------|-----------------------------------------------------------------|-----------|----------|-----------|
| GAS5        | Kidney cancer | Expression       | Tumor suppressor                                                                                                                                                                                                                 | chr1  | 1.74E+08 | 1.74E+08 | -      | Human   | NCRNA00030; SNHG2                                               | NR_002578 | Gene/RNA | 24373479  |
| H19         | Kidney cancer | Regulation       | Tumor suppressor; tumor suppressor host                                                                                                                                                                                          | chr11 | 1995176  | 2001466  | -      | Human   | ASM; ASM1; BWS; D11S813E; LINC00008; NCRNA00008; WT2            | NR_131223 | Gene/RNA | 24373479  |
| HIF1A-AS1   | Kidney cancer | Expression       | The antitumor DNA topoisomerase I (Top1) inhibitor camptothecin (CPT) increases the cellular levels of two antisense lncRNAs at the 5' (5'aHIF-1 $\alpha$ ) and 3' (3'aHIF-1 $\alpha$ ) ends of the human <i>HIF1A-AS1</i> gene. | chr14 | 61681041 | 61695823 | -      | Human   | 5'aHIF-1A; 5'aHIF1alpha                                         | NR_047116 | Gene/RNA | 21897117  |
| HIF1A-AS1   | Kidney cancer | Expression       | Diagnostic and discriminative marker                                                                                                                                                                                             | chr14 | 61681041 | 61695823 | -      | Human   | 5'aHIF-1A; 5'aHIF1alpha                                         | NR_047116 | Gene/RNA | 24373479  |
| HIF1A-AS1   | Kidney cancer | Expression       | Overexpressed in human renal cancer and during hypoxia                                                                                                                                                                           | chr14 | 61681041 | 61695823 | -      | Human   | 5'aHIF-1A; 5'aHIF1alpha                                         | NR_047116 | Gene/RNA | 9923855   |
| HIF1A-AS2   | Kidney cancer | Expression       | Diagnostic and discriminative marker                                                                                                                                                                                             | chr14 | 61747039 | 61749089 | -      | Human   | 3'aHIF-1A; aHIF                                                 | NR_045406 | Gene/RNA | 24373479  |
| KCNQ1OT1    | Kidney cancer | Regulation       | Oncogene                                                                                                                                                                                                                         | chr11 | 2608328  | 2699998  | -      | Human   | KCNQ1-AS2; KCNQ10T1; Kncq1; KvDMR1; KvLQT1-AS; LIT1; NCRNA00012 | NR_002728 | Gene/RNA | 24373479  |
| MALAT1      | Kidney cancer | Regulation       | Oncogene                                                                                                                                                                                                                         | chr11 | 65497679 | 65504494 | +      | Human   | HCN; LINC00047; NCRNA00047; NEAT2; PRO2853                      | NR_002819 | Gene/RNA | 24373479  |

Table S1. Continued.

| lncRNA name  | Disease name  | Dysfunction type | Description                                                                                                                                                                          | Chr   | Start    | End      | Strand | Species | Alias                                                                         | Genbank   | Sequence | Reference |
|--------------|---------------|------------------|--------------------------------------------------------------------------------------------------------------------------------------------------------------------------------------|-------|----------|----------|--------|---------|-------------------------------------------------------------------------------|-----------|----------|-----------|
| MEG3         | Kidney cancer | Expression       | Tumor suppressor                                                                                                                                                                     | chr14 | 1.01E+08 | 1.01E+08 | +      | Human   | FP504; GTIL2; LINC00023; NCRNA00023; PRO0518; PRO2160; onco-lncRNA-83; prebp1 | NR_046472 | Gene/RNA | 24373479  |
| PVT1         | Kidney cancer | Mutation         | Variants (rs13447075, A>C; rs2648862, A>C) in the plasmacytoma variant translocation gene ( <i>PVT1</i> ) are associated with end-stage renal disease attributed to type 1 diabetes. | chr8  | 1.28E+08 | 1.28E+08 | +      | Human   | LINC00079; MYC; NCRNA00079; onco-lncRNA-100                                   | NR_003367 | Gene/RNA | 17881614  |
| EPB41L4A-AS2 | Kidney cancer | Regulation       | The long non-coding RNA EPB41L4A-AS2 inhibits tumor proliferation and is associated with favorable prognoses in breast cancer and other solid tumors.                                | chr5  | 1.12E+08 | 1.12E+08 | +      | Human   | N/A                                                                           | NR_027706 | Gene/RNA | 26980733  |
| MALAT1       | Kidney cancer | Expression       | MALAT1 may serve as a potential prognostic biomarker for various cancers                                                                                                             | chr11 | 65497679 | 65504494 | +      | Human   | HCN; LINC00047; NCRNA00047; NEAT2; PRO2853                                    | NR_002819 | Gene/RNA | 26254614  |
