# Supplementary material for: Mechanism of tumor-derived extracellular vesicles in regulating renal cell carcinoma progression by the delivery of MALAT1
Source: PubMed Central journal article supplement — Oncol Rep. 2021 Jul 12;46(3):187. doi: 10.3892/or.2021.8138 (PMC8298989; doi:10.3892/or.2021.8138), 2021-07-12
Supplement: Supplementary_Data4.pdf [file Supplementary_Data4.pdf]

Table SIV. Binding sites between ETS1 and the TFCP2L1 promoter.

| Matrix ID | Name | Score   | Relative score | Sequence ID                      | Start | End  | Strand | Predicted sequence |
|-----------|------|---------|----------------|----------------------------------|-------|------|--------|--------------------|
| MA0098.1  | ETS1 | 7.79718 | 0.999999999    | hg38_knownGene_ENST00000263707.6 | 1863  | 1868 | -      | tttccg             |
| MA0098.1  | ETS1 | 7.63289 | 0.992421538    | hg38_knownGene_ENST00000263707.6 | 151   | 156  | -      | cttct              |
| MA0098.1  | ETS1 | 7.63289 | 0.992421538    | hg38_knownGene_ENST00000263707.6 | 486   | 491  | -      | cttct              |
| MA0098.1  | ETS1 | 7.63289 | 0.992421538    | hg38_knownGene_ENST00000263707.6 | 950   | 955  | +      | cttct              |
| MA0098.1  | ETS1 | 7.63289 | 0.992421538    | hg38_knownGene_ENST00000263707.6 | 1039  | 1044 | +      | cttct              |
| MA0098.1  | ETS1 | 7.63289 | 0.992421538    | hg38_knownGene_ENST00000263707.6 | 1083  | 1088 | -      | cttct              |
| MA0098.1  | ETS1 | 7.63289 | 0.992421538    | hg38_knownGene_ENST00000263707.6 | 1650  | 1655 | -      | tttct              |
| MA0098.1  | ETS1 | 7.63289 | 0.992421538    | hg38_knownGene_ENST00000263707.6 | 1927  | 1932 | +      | cttct              |
| MA0098.1  | ETS1 | 7.39347 | 0.981377955    | hg38_knownGene_ENST00000263707.6 | 691   | 696  | -      | tatccg             |
| MA0098.1  | ETS1 | 7.22918 | 0.973799495    | hg38_knownGene_ENST00000263707.6 | 98    | 103  | -      | catcct             |
| MA0098.1  | ETS1 | 6.29975 | 0.930928106    | hg38_knownGene_ENST00000263707.6 | 8     | 13   | +      | tttcca             |
| MA0098.1  | ETS1 | 6.29975 | 0.930928106    | hg38_knownGene_ENST00000263707.6 | 110   | 115  | -      | cttcca             |
| MA0098.1  | ETS1 | 6.29975 | 0.930928106    | hg38_knownGene_ENST00000263707.6 | 147   | 152  | -      | cttcca             |
| MA0098.1  | ETS1 | 6.29975 | 0.930928106    | hg38_knownGene_ENST00000263707.6 | 797   | 802  | +      | tttcca             |
| MA0098.1  | ETS1 | 6.29975 | 0.930928106    | hg38_knownGene_ENST00000263707.6 | 1677  | 1682 | -      | tttcca             |
| MA0098.1  | ETS1 | 5.97749 | 0.916063081    | hg38_knownGene_ENST00000263707.6 | 141   | 146  | -      | gttct              |
| MA0098.1  | ETS1 | 5.97749 | 0.916063081    | hg38_knownGene_ENST00000263707.6 | 365   | 370  | +      | gttct              |
| MA0098.1  | ETS1 | 5.97749 | 0.916063081    | hg38_knownGene_ENST00000263707.6 | 532   | 537  | -      | gttct              |
| MA0098.1  | ETS1 | 5.97749 | 0.916063081    | hg38_knownGene_ENST00000263707.6 | 1114  | 1119 | +      | attct              |
| MA0098.1  | ETS1 | 5.89604 | 0.912306063    | hg38_knownGene_ENST00000263707.6 | 564   | 569  | +      | catcca             |
| MA0098.1  | ETS1 | 5.89604 | 0.912306063    | hg38_knownGene_ENST00000263707.6 | 702   | 707  | -      | tatcca             |
| MA0098.1  | ETS1 | 5.89604 | 0.912306063    | hg38_knownGene_ENST00000263707.6 | 1048  | 1053 | +      | catcca             |
| MA0098.1  | ETS1 | 5.77712 | 0.906820739    | hg38_knownGene_ENST00000263707.6 | 422   | 427  | -      | tttccc             |
| MA0098.1  | ETS1 | 5.77712 | 0.906820739    | hg38_knownGene_ENST00000263707.6 | 888   | 893  | +      | cttccc             |
| MA0098.1  | ETS1 | 5.77712 | 0.906820739    | hg38_knownGene_ENST00000263707.6 | 1012  | 1017 | +      | tttccc             |
| MA0098.1  | ETS1 | 5.77712 | 0.906820739    | hg38_knownGene_ENST00000263707.6 | 1247  | 1252 | -      | tttccc             |
| MA0098.1  | ETS1 | 5.73807 | 0.905019521    | hg38_knownGene_ENST00000263707.6 | 1351  | 1356 | -      | gatccg             |
| MA0098.3  | ETS1 | 10.0365 | 0.902502406    | hg38_knownGene_ENST00000263707.6 | 484   | 493  | +      | agaggaagtg         |
| MA0098.1  | ETS1 | 5.57378 | 0.897441038    | hg38_knownGene_ENST00000263707.6 | 849   | 854  | +      | aatcc              |
| MA0098.3  | ETS1 | 9.36656 | 0.891117317    | hg38_knownGene_ENST00000263707.6 | 1861  | 1870 | +      | gccggaagg          |
| MA0098.1  | ETS1 | 5.37341 | 0.888198674    | hg38_knownGene_ENST00000263707.6 | 291   | 296  | -      | tatccc             |
| MA0098.1  | ETS1 | 5.37341 | 0.888198674    | hg38_knownGene_ENST00000263707.6 | 303   | 308  | -      | catccc             |
| MA0098.1  | ETS1 | 5.37341 | 0.888198674    | hg38_knownGene_ENST00000263707.6 | 314   | 319  | +      | tatccc             |
| MA0098.1  | ETS1 | 5.37341 | 0.888198674    | hg38_knownGene_ENST00000263707.6 | 608   | 613  | -      | catccc             |
| MA0098.3  | ETS1 | 8.46078 | 0.875725131    | hg38_knownGene_ENST00000263707.6 | 689   | 698  | +      | accggatagc         |
| MA0098.3  | ETS1 | 8.11186 | 0.869795881    | hg38_knownGene_ENST00000263707.6 | 1925  | 1934 | -      | ccaggaagcg         |
| MA0098.3  | ETS1 | 7.47885 | 0.859038842    | hg38_knownGene_ENST00000263707.6 | 1037  | 1046 | -      | aaaggaagca         |
| MA0098.1  | ETS1 | 4.64436 | 0.854569672    | hg38_knownGene_ENST00000263707.6 | 1002  | 1007 | -      | gttcca             |
| MA0098.3  | ETS1 | 6.78207 | 0.847198274    | hg38_knownGene_ENST00000263707.6 | 96    | 105  | +      | tcaggatgtt         |
| MA0098.1  | ETS1 | 4.24064 | 0.835947628    | hg38_knownGene_ENST00000263707.6 | 623   | 628  | -      | aatcca             |
| MA0098.1  | ETS1 | 4.12173 | 0.830462283    | hg38_knownGene_ENST00000263707.6 | 115   | 120  | +      | gttccc             |
| MA0098.1  | ETS1 | 4.12173 | 0.830462283    | hg38_knownGene_ENST00000263707.6 | 429   | 434  | +      | attccc             |
| MA0098.1  | ETS1 | 4.12173 | 0.830462283    | hg38_knownGene_ENST00000263707.6 | 723   | 728  | -      | gttccc             |
| MA0098.1  | ETS1 | 4.12173 | 0.830462283    | hg38_knownGene_ENST00000263707.6 | 990   | 995  | -      | gttccc             |
| MA0098.3  | ETS1 | 5.43437 | 0.824296446    | hg38_knownGene_ENST00000263707.6 | 149   | 158  | +      | gaaggaagca         |
| MA0098.3  | ETS1 | 5.30047 | 0.822021057    | hg38_knownGene_ENST00000263707.6 | 411   | 420  | +      | acctgaagcc         |
| MA0098.1  | ETS1 | 3.83867 | 0.81740568     | hg38_knownGene_ENST00000263707.6 | 1844  | 1849 | -      | cctccg             |
| MA0098.1  | ETS1 | 3.83867 | 0.81740568     | hg38_knownGene_ENST00000263707.6 | 1914  | 1919 | +      | cctccg             |
| MA0098.1  | ETS1 | 3.82245 | 0.816657782    | hg38_knownGene_ENST00000263707.6 | 283   | 288  | +      | cttctg             |
| MA0098.1  | ETS1 | 3.82245 | 0.816657782    | hg38_knownGene_ENST00000263707.6 | 1877  | 1882 | -      | ctcccg             |
| MA0098.3  | ETS1 | 4.81729 | 0.813810211    | hg38_knownGene_ENST00000263707.6 | 1842  | 1851 | +      | cccggagcgc         |
| MA0098.1  | ETS1 | 3.71801 | 0.811840239    | hg38_knownGene_ENST00000263707.6 | 644   | 649  | +      | aatccc             |
| MA0098.1  | ETS1 | 3.71801 | 0.811840239    | hg38_knownGene_ENST00000263707.6 | 1456  | 1461 | +      | aatccc             |
| MA0098.3  | ETS1 | 4.61137 | 0.810310947    | hg38_knownGene_ENST00000263707.6 | 281   | 290  | -      | agcagaagta         |
| MA0098.1  | ETS1 | 3.67437 | 0.809827219    | hg38_knownGene_ENST00000263707.6 | 158   | 163  | -      | cctct              |

Table SIV. Continued.

| Matrix ID | Name | Score   | Relative score | Sequence ID                      | Start | End  | Strand | Predicted sequence |
|-----------|------|---------|----------------|----------------------------------|-------|------|--------|--------------------|
| MA0098.1  | ETS1 | 3.67437 | 0.809827219    | hg38_knownGene_ENST00000263707.6 | 176   | 181  | -      | tgtcct             |
| MA0098.1  | ETS1 | 3.67437 | 0.809827219    | hg38_knownGene_ENST00000263707.6 | 320   | 325  | -      | cctcct             |
| MA0098.1  | ETS1 | 3.67437 | 0.809827219    | hg38_knownGene_ENST00000263707.6 | 437   | 442  | +      | tctcct             |
| MA0098.1  | ETS1 | 3.67437 | 0.809827219    | hg38_knownGene_ENST00000263707.6 | 524   | 529  | -      | cctcct             |
| MA0098.1  | ETS1 | 3.67437 | 0.809827219    | hg38_knownGene_ENST00000263707.6 | 652   | 657  | +      | tctcct             |
| MA0098.1  | ETS1 | 3.67437 | 0.809827219    | hg38_knownGene_ENST00000263707.6 | 736   | 741  | +      | cctcct             |
| MA0098.1  | ETS1 | 3.67437 | 0.809827219    | hg38_knownGene_ENST00000263707.6 | 862   | 867  | +      | tgtcct             |
| MA0098.1  | ETS1 | 3.67437 | 0.809827219    | hg38_knownGene_ENST00000263707.6 | 897   | 902  | +      | cctcct             |
| MA0098.1  | ETS1 | 3.67437 | 0.809827219    | hg38_knownGene_ENST00000263707.6 | 910   | 915  | +      | tctcct             |
| MA0098.1  | ETS1 | 3.67437 | 0.809827219    | hg38_knownGene_ENST00000263707.6 | 920   | 925  | +      | tctcct             |
| MA0098.1  | ETS1 | 3.67437 | 0.809827219    | hg38_knownGene_ENST00000263707.6 | 1075  | 1080 | +      | cctcct             |
| MA0098.1  | ETS1 | 3.67437 | 0.809827219    | hg38_knownGene_ENST00000263707.6 | 1221  | 1226 | +      | tgtcct             |
| MA0098.1  | ETS1 | 3.67437 | 0.809827219    | hg38_knownGene_ENST00000263707.6 | 1470  | 1475 | -      | cctcct             |
| MA0098.1  | ETS1 | 3.67437 | 0.809827219    | hg38_knownGene_ENST00000263707.6 | 1483  | 1488 | -      | tctcct             |
| MA0098.1  | ETS1 | 3.67437 | 0.809827219    | hg38_knownGene_ENST00000263707.6 | 1505  | 1510 | -      | tctcct             |
| MA0098.1  | ETS1 | 3.65816 | 0.809079322    | hg38_knownGene_ENST00000263707.6 | 104   | 109  | +      | tttctt             |
| MA0098.1  | ETS1 | 3.65816 | 0.809079322    | hg38_knownGene_ENST00000263707.6 | 116   | 121  | +      | ttcctt             |
| MA0098.1  | ETS1 | 3.65816 | 0.809079322    | hg38_knownGene_ENST00000263707.6 | 161   | 166  | -      | ctcctt             |
| MA0098.1  | ETS1 | 3.65816 | 0.809079322    | hg38_knownGene_ENST00000263707.6 | 520   | 525  | -      | ctcctt             |
| MA0098.1  | ETS1 | 3.65816 | 0.809079322    | hg38_knownGene_ENST00000263707.6 | 547   | 552  | -      | ctcctt             |
| MA0098.1  | ETS1 | 3.65816 | 0.809079322    | hg38_knownGene_ENST00000263707.6 | 722   | 727  | -      | ttcctt             |
| MA0098.1  | ETS1 | 3.65816 | 0.809079322    | hg38_knownGene_ENST00000263707.6 | 733   | 738  | +      | ctcctt             |
| MA0098.1  | ETS1 | 3.65816 | 0.809079322    | hg38_knownGene_ENST00000263707.6 | 989   | 994  | -      | ttcctt             |
| MA0098.1  | ETS1 | 3.65816 | 0.809079322    | hg38_knownGene_ENST00000263707.6 | 1013  | 1018 | +      | ttcctt             |
| MA0098.1  | ETS1 | 3.65816 | 0.809079322    | hg38_knownGene_ENST00000263707.6 | 1122  | 1127 | +      | tttctt             |
| MA0098.3  | ETS1 | 4.31111 | 0.805208466    | hg38_knownGene_ENST00000263707.6 | 1081  | 1090 | +      | ccaggaaggc         |
| MA0098.3  | ETS1 | 4.1923  | 0.803189635    | hg38_knownGene_ENST00000263707.6 | 1675  | 1684 | +      | gctggaaatc         |
| MA0098.3  | ETS1 | 4.04174 | 0.800631045    | hg38_knownGene_ENST00000263707.6 | 363   | 372  | -      | ccaggaactg         |
